# Supplementary material for: Healthcare practitioner experiences and willingness to prescribe pre-exposure prophylaxis in the US
Source: PLoS One. 2020 Sep 3;15(9):e0238375. doi: 10.1371/journal.pone.0238375 (PMC7470257; doi:10.1371/journal.pone.0238375)
Supplement: S2 File — This csv file comprises of participant responses to the survey that is provided in the S1 File. (CSV) [file pone.0238375.s002.csv]

Obs	course	Age	Gender	ethnic_race	State	Qualification	length_practicing	specialty	prescribed_prep	pop_MSM	pop_IDU	pop_hetero	pop_conception	partners_hivstatus	hivpositive_male	hivpositive_female	refer	counseling	malemsm_case1	heteroconception_case2	idu_case3	barriers
1	4	49	0	5	0	0	1	1	1	1	0	0	0	3	3	3	0	0	2	2	1
2	4	51	0	1	0	2	1	0	1	1	0	0	0	3	3	3	1	1	2	2	1	Cost, adherence to regimen
3	4	46	0	1	1	6	1	5	0	-99	-99	-99	-99	-99	-99	-99	-99	-99	-99	-99	-99
4	4	61	1	1	2	2	4	5	1	0	0	0	1	4	4	4	1	1	2	1	5	Patient concerns of medications affecting fetus; cost/availability; denial by patient and partner that fetus could be affected (education VERY important even for providers.
5	4	58	1	3	0	5	-99	0	0	-99	-99	-99	-99	4	4	4	0	0	2	1	1
6	4	65	1	3	3	0	4	1	0	-99	-99	-99	-99	4	3	3	3	-99	0	1	2	Cost
7	4	63	0	3	3	6	4	5	-99	-99	-99	-99	-99	4	4	4	0	0	2	2	1	Compliance
8	4	49	1	1	2	2	1	2	0	-99	-99	-99	-99	4	4	4	0	0	2	1	2	(1) Payment for ovulation kits; (2) Referral sources if they don't get pregnant after 6-12 months
9	4	40	0	1	2	0	1	2	1	1	0	0	0	3	3	3	1	1	2	3	4	Limited safety data and pregnancy
10	4	45	1	3	4	5	0	0	0	-99	-99	-99	-99	4	2	4	0	0	2	2	1
11	4	36	1	7	30	0	3	0	1	1	0	0	0	3	3	3	3	1	2	2	1	Health literacy: The population at risk is not educated about the availability and if they are, they may not think they have the access to care due to lack of insurance, highlighting the importance of case managers.
12	4	68	1	1	1	4	4	0	0	-99	-99	-99	-99	4	4	4	1	1	2	-99	-99
13	4	-99	1	1	1	5	4	5	0	-99	-99	-99	-99	1	1	1	0	4	2	2	4
14	4	73	1	1	1	6	4	5	-99	-99	-99	-99	-99	-99	-99	-99	-99	-99	-99	-99	-99	Marked "N/A" since pharmacist
15	4	43	1	1	31	6	1	5	0	-99	-99	-99	-99	2	2	2	1	1	3	1	1	N/A
16	4	39	0	5	5	0	3	0	1	0	0	0	1	3	3	3	0	2	2	1	1	Followups by HIV- partner once on therapy (PrEP) as they don't feel "sick."
17	4	65	0	1	1	0	4	0	0	-99	-99	-99	-99	3	3	3	2	2	2	2	1
18	4	59	0	1	2	0	4	0	0	-99	-99	-99	-99	4	4	4	0	2	2	1	1
19	4	54	1	1	0	2	4	2	0	-99	-99	-99	-99	4	4	4	1	3	-99	1	-99
20	4	44	0	7	0	2	1	2	1	1	0	0	0	3	3	3	1	1	2	2	2	Insurance; tolerability
21	4	55	0	3	0	1	1	2	0	-99	-99	-99	-99	3	3	3	1	2	2	1	1
22	4	36	1	3	0	6	2	0	0	-99	-99	-99	-99	4	4	4	1	1	2	2	1
23	4	49	1	1	4	4	4	6	0	-99	-99	-99	-99	2	2	2	0	0	2	2	1
24	4	63	1	7	1	4	4	2	0	-99	-99	-99	-99	4	4	4	1	1	2	2	4	Cost of ARV for HIV- partner
25	4	59	0	0	6	0	4	3	0	-99	-99	-99	-99	4	4	4	0	0	2	1	0	Fear of damage to the fetus
26	4	38	1	3	1	0	3	0	0	-99	-99	-99	-99	2	2	2	1	1	2	2	1
27	4	53	0	1	0	0	4	1	1	1	0	0	0	3	1	-99	0	0	2	1	2
28	4	53	0	1	0	0	4	1	1	1	0	0	0	2	2	-99	0	2	2	2	2
29	4	30	1	1	0	1	0	0	0	-99	-99	-99	-99	3	3	3	1	1	2	2	0	hepato/nephntoxic effects
30	4	37	0	1	0	1	2	5	1	1	0	0	0	4	4	4	2	1	2	1	1	cost
31	4	33	1	1	0	1	3	2	1	1	0	0	0	2	3	3	1	2	0	1	0
32	4	52	1	1	1	0	1	2	1	1	0	0	1	2	3	3	1	1	2	4	4	I have a discordant couple now, male is +, high specialist copays for ART, and truvada co-pay is $130/month
33	4	67	1	1	0	1	4	0	1	1	0	0	0	2	4	4	1	0	2	1	2	Women not wanting to take medications because of predicted risk to fetus
34	4	45	1	1	4	1	1	0	0	-99	-99	-99	-99	4	4	4	1	1	2	1	1	Currently my RW funded program has no mechanism to provide this to patients - our university based clinic will Rx for insured.
35	4	49	0	3	0	4	2	0	0	-99	-99	-99	-99	2	3	3	1	1	2	1	2
36	4	32	1	3	0	4	2	0	0	-99	-99	-99	-99	1	2	1	2	1	2	1	1
37	4	-99	1	3	0	2	2	2	0	-99	-99	-99	-99	4	4	4	0	1	2	2	5
38	4	75	0	1	30	0	3	-99	0	-99	-99	-99	-99	0	0	0	2	2	2	1	1
39	4	66	1	1	0	2	4	0	-99	-99	-99	-99	-99	4	4	4	2	2	2	1	1
40	4	66	1	1	31	4	4	0	-99	-99	-99	-99	-99	4	4	4	2	2	2	2	1	Marked "N/A" to #8 ab prescribing PrEP
41	4	31	0	3	-99	5	-99	0	-99	-99	-99	-99	-99	-99	-99	-99	1	-99	2	1	1
42	4	59	1	1	0	1	4	0	1	1	0	0	0	4	4	4	2	1	0	1	2	None so far, fear of payment issues for some patients but these have not turned out to matter
43	4	39	1	3	-99	0	-99	5	-99	-99	-99	-99	-99	-99	-99	-99	-99	-99	2	1	2
44	4	-99	1	6	1	6	2	4	0	-99	-99	-99	-99	1	1	1	1	1	2	1	4
45	4	68	1	1	31	4	4	0	0	-99	-99	-99	-99	5	5	5	2	2	2	1	1	Adherence may not be good; med back up
46	4	46	1	1	0	4	1	0	0	-99	-99	-99	-99	3	3	3	1	1	1	2	1
47	4	53	1	3	1	4	-99	-99	0	-99	-99	-99	-99	4	4	4	-99	1	-99	-99	-99	Marked "N/A" to #8 ab prescribing PrEP
48	4	-99	1	3	2	0	2	0	0	-99	-99	-99	-99	3	3	3	2	1	2	2	2
49	4	-99	1	1	2	0	4	0	1	1	1	1	0	2	2	3	2	1	2	1	1	Cost
50	4	47	1	1	2	2	1	0	0	-99	-99	-99	-99	2	2	2	0	2	2	1	1
51	4	61	1	1	35	0	-99	0	-99	-99	-99	-99	-99	-99	-99	-99	-99	-99	2	2	1	"NA" #6, 8-13
52	4	66	1	1	0	0	4	0	1	1	0	0	0	2	2	2	2	2	2	2	1	Don't have important ancillary services
53	4	46	1	3	1	1	1	0	0	-99	-99	-99	-99	3	3	3	2	1	2	1	1	N/A
54	4	62	1	1	1	4	4	0	-99	-99	-99	-99	-99	4	4	4	0	0	-99	2	-99
55	4	40	1	3	1	2	2	5	0	-99	-99	-99	-99	2	3	-99	-99	0	2	2	1
56	4	31	1	0	1	4	2	0	0	-99	-99	-99	-99	3	3	3	1	1	2	2	1	Is PrEP safe for the fetus, planning start of PrEP regimen
57	4	48	1	3	0	2	2	0	1	-99	-99	-99	-99	4	4	4	2	1	2	-99	1
58	4	30	1	3	0	2	3	2	0	-99	-99	-99	-99	4	4	4	0	0	2	1	1	None
59	4	37	1	5	30	0	2	4	0	-99	-99	-99	-99	3	3	3	-99	-99	2	1	1	No practical experience
60	4	33	1	1	7	2	2	2	0	-99	-99	-99	-99	4	4	4	1	2	-99	-99	1
61	4	-99	-99	5	0	0	4	0	0	-99	-99	-99	-99	4	4	4	2	3	2	2	1
62	4	45	1	1	1	4	1	0	0	-99	-99	-99	-99	4	4	4	1	1	2	2	2
63	4	32	1	5	30	0	3	1	0	-99	-99	-99	-99	4	4	3	0	3	2	2	1
64	4	31	1	1	1	4	3	0	0	-99	-99	-99	-99	3	3	3	2	2	2	2	-99
65	4	42	1	3	1	4	2	0	0	-99	-99	-99	-99	3	3	2	2	0	0	1	0	Socio-economic status & educational challenges
66	4	53	1	1	0	0	1	0	1	0	0	0	1	4	4	4	0	1	1	1	1
67	4	56	0	1	4	0	4	2	0	-99	-99	-99	-99	2	4	4	3	3	0	1	1	Cost
68	4	59	0	1	0	0	4	1	1	1	0	0	0	2	2	2	0	3	0	1	2	Cost
69	4	77	0	1	0	2	4	2	1	1	0	0	0	2	2	2	0	2	1	2	1
70	4	47	1	1	8	2	2	2	0	-99	-99	-99	-99	2	4	4	1	2	2	2	1
71	4	56	1	1	8	4	1	0	0	-99	-99	-99	-99	-99	-99	-99	-99	-99	2	1	2	To my knowledge, PrEP is only used for transmission between MSM in my state. This is a question for me to ask of the Ryan White providers in WV.
72	4	57	1	1	8	4	-99	0	0	-99	-99	-99	-99	-99	-99	-99	-99	-99	2	1	3	Non-adherence possibly
73	4	66	1	6	1	0	4	0	0	-99	-99	-99	-99	4	4	4	1	1	2	2	2
74	4	40	0	1	4	0	2	0	0	-99	-99	-99	-99	4	4	4	1	1	2	1	1	Insurance (or lackthereof)
75	4	64	1	1	1	4	4	5	0	-99	-99	-99	-99	2	2	2	0	1	1	2	4	(1) Who is willing to pay and follow PrEP; (2) which OB's comfortable with PrEP during pregnancy for non HIV+ patients
76	4	44	0	1	9	0	1	2	1	1	0	0	0	3	4	4	1	0	2	1	1	Lack of awareness / lack of need; Concerns about impact on developing fetus
77	4	53	0	0	0	0	4	0	1	1	0	0	0	3	3	3	1	-99	2	1	2	Potential for birth defects; risk for acquiring HIV even with PrEP
78	4	30	0	1	10	0	3	2	0	-99	-99	-99	-99	4	4	4	1	0	2	1	2	Cost
79	4	32	1	1	2	0	0	0	0	-99	-99	-99	-99	3	2	3	2	3	2	1	1
80	4	45	0	7	0	0	1	0	1	1	0	0	0	3	4	4	0	1	2	1	4
81	4	40	1	1	1	2	1	0	1	1	0	0	0	4	4	4	0	1	2	2	1
82	4	44	1	1	0	2	1	0	1	1	0	0	0	4	4	4	4	4	2	1	2	None
83	4	50	1	3	0	4	3	0	1	1	0	1	0	4	4	4	2	0	2	1	0	Most individuals are not trusting of HIV drugs, let alone to take HIV drug while attempting to conceive for fear of "poisoning."
84	4	64	0	1	4	0	4	0	1	1	0	0	0	1	4	4	2	3	0	1	1
85	4	49	1	1	1	2	1	0	0	-99	-99	-99	-99	3	3	3	2	0	2	1	2	I work with only HIV + patient. I discuss PrEP but partners are rarely in room during visit.
86	4	38	1	3	1	0	3	0	0	-99	-99	-99	-99	4	4	4	0	0	2	1	2
87	4	48	1	5	2	0	2	2	1	1	1	0	0	1	1	1	1	1	2	2	1
88	4	68	1	3	4	4	4	2	0	-99	-99	-99	-99	3	4	4	0	1	2	2	2	Not sure - what habe been research results in this area? Effectiveness? Barriers would be the usual ones access, affordability, and availability
89	4	34	0	5	0	0	3	2	1	1	0	0	0	1	4	4	0	2	0	2	0
90	4	28	1	5	0	1	3	1	1	1	0	0	0	3	3	3	0	2	2	1	2	Cost, adherence, GI side effects
91	4	36	1	1	0	4	3	0	-99	-99	-99	-99	-99	-99	-99	-99	0	2	1	1	4	"NA" 8-11 bc "RN"
92	4	-99	-99	7	1	0	2	1	0	-99	-99	-99	-99	4	4	4	0	0	2	1	1
93	4	32	1	1	0	0	3	2	1	0	0	1	0	3	2	2	0	3	2	1	4
94	2	48	1	3	11	2	1	2	0	-99	-99	-99	-99	4	3	3	0	2	2	1	2
95	2	53	0	5	11	0	4	0	1	1	0	0	0	4	4	4	2	1	2	2	1
96	2	39	0	5	-99	6	2	0	0	-99	-99	-99	-99	-99	-99	-99	0	2	2	2	1	9-11 "not applicable"
97	2	27	1	3	11	5	3	0	0	-99	-99	-99	-99	4	2	3	2	3	2	2	0	Cost
98	2	40	1	-99	11	1	2	2	0	-99	-99	-99	-99	3	3	3	1	1	2	2	2	Side effects of meds & cost, unknowns for fetus
99	2	58	1	1	12	0	4	1	1	1	0	0	0	4	4	4	3	1	2	1	1
100	2	51	1	1	11	2	1	2	1	1	0	1	0	4	4	4	0	3	2	1	2	Concern for effect on fetus by mother; getting Rx paid for
101	2	67	0	1	11	0	3	2	0	-99	-99	-99	-99	1	0	-99	2	0	2	1	1	N/A. I work in a male prison
102	2	58	0	5	11	0	4	1	1	1	0	0	0	4	3	4	1	1	0	1	1	I have not done this but possibly terrgeineity effect from PrEP is an issue
103	2	61	0	1	11	0	4	2	0	-99	-99	-99	-99	1	1	1	3	2	0	1	1
104	2	33	1	5	11	4	2	0	1	1	0	0	1	4	4	4	1	1	2	1	1	Insurance barriers
105	2	35	1	5	11	0	3	1	1	1	0	0	0	3	3	3	1	1	2	1	4	Costs
106	2	60	1	-99	11	2	2	2	0	-99	-99	-99	-99	4	2	5	1	4	2	2	1	I am conflicted ethically. I have no clear direction at this time
107	2	57	1	1	11	4	1	5	0	-99	-99	-99	-99	-99	-99	-99	-99	-99	-99	-99	-99
108	2	46	0	0	11	0	1	0	0	-99	-99	-99	-99	4	4	4	1	0	2	2	0	No barriers perceived
109	2	54	0	1	11	0	1	0	1	1	0	0	0	4	4	4	2	1	2	1	4
110	2	55	1	7	11	0	1	1	0	-99	-99	-99	-99	4	4	4	0	1	2	1	4	This is not my usual area of practice! But I hope it becomes widely available
111	2	43	0	1	11	0	1	2	1	1	0	1	1	3	3	3	0	0	2	1	1	Cost - no coverage by insurers
112	2	72	0	1	11	0	4	0	1	1	0	0	0	3	3	3	1	3	2	4	1
113	2	33	1	5	11	0	3	2	1	1	0	1	1	3	4	4	1	0	2	1	1
114	2	42	0	5	11	6	1	5	1	1	1	0	0	4	4	3	0	2	2	1	1	Cost + coverage for pt; Program to f/u with patients
115	2	69	0	1	11	0	4	1	1	1	1	1	0	4	4	4	1	1	2	2	2	N/A
116	2	62	1	1	11	0	4	4	0	-99	-99	-99	-99	3	3	3	1	2	2	2	1
117	2	56	1	1	11	4	4	4	0	-99	-99	-99	-99	5	5	5	-99	1	2	3	4
118	2	42	1	5	11	2	2	4	0	-99	-99	-99	-99	2	2	2	2	2	2	2	1
119	2	30	1	1	11	4	3	5	0	-99	-99	-99	-99	1	1	1	0	0	2	1	0
120	2	36	1	0	11	2	3	1	1	1	0	0	1	4	4	4	3	1	4	3	4	Possible insurance barriers
121	2	34	1	1	11	0	3	0	0	-99	-99	-99	-99	4	4	4	4	3	4	1	1
122	2	60	0	2	-99	4	-99	5	0	-99	-99	-99	-99	2	2	0	-99	1	0	0	1
123	2	56	1	0	11	2	1	6	0	-99	-99	-99	-99	4	4	4	0	1	2	4	4	Our clinic cares for 99% HIV + patients. We have difficulty with the logistics in providing PrEP to sero negative partners. Inusrance coverage is a big issue. Getting care (primary) for PrEP monitoring has been problematic - oftern there is a great time delay.
124	2	33	1	5	11	0	3	0	0	-99	-99	-99	-99	3	3	3	1	1	2	2	1
125	2	31	0	1	11	6	0	2	0	-99	-99	-99	-99	4	4	4	-99	-99	2	1	1	Doesn't know what Assisted Reproductive Technology services is
126	2	26	0	5	11	6	0	2	0	-99	-99	-99	-99	4	4	4	1	1	2	1	1
127	2	35	0	5	11	0	3	0	0	-99	-99	-99	-99	3	3	3	0	1	2	4	4	Being able to see partner in clinic and we are currently funded to see only HIV+ patients
128	2	71	0	5	11	0	4	2	0	-99	-99	-99	-99	3	4	4	2	1	2	1	1	Side effects of medications
129	2	60	0	1	13	1	4	2	1	0	0	0	1	4	4	4	1	1	2	2	1
130	2	43	1	5	11	0	2	0	1	1	0	0	0	2	2	2	1	2	0	1	1	Continued use
131	2	63	0	1	11	0	4	0	0	-99	-99	-99	-99	3	2	3	1	1	2	2	2	Compliance
132	2	62	0	1	11	2	4	2	1	1	0	1	0	4	4	4	2	1	2	1	1	Safety/efficacy of TDF long term data
133	2	57	0	4	11	3	4	0	1	1	0	1	0	4	4	4	2	0	2	1	0
134	2	64	0	1	11	0	4	1	1	1	0	0	0	4	4	4	2	2	2	1	2	Unknown risk. Insufficient knowledge about safety
135	2	54	0	0	11	0	1	2	0	-99	-99	-99	-99	2	4	4	0	2	0	2	4
136	2	64	1	1	11	2	1	2	1	1	0	0	0	1	3	4	4	0	2	1	2	Price; access
137	2	67	0	1	11	2	4	1	0	-99	-99	-99	-99	1	1	4	0	0	2	1	0	None
138	2	39	0	5	11	0	3	2	1	1	0	1	0	4	4	4	0	0	2	2	0
139	2	71	0	1	11	0	4	1	1	1	0	0	0	3	2	1	2	1	2	2	1	N/A
140	2	43	1	1	11	5	-99	5	0	-99	-99	-99	-99	-99	-99	-99	0	0	2	1	0	N/A
141	2	57	1	1	11	4	2	6	0	-99	-99	-99	-99	3	4	4	0	0	2	2	1
142	2	52	0	0	11	6	2	0	1	0	0	0	0	0	3	3	2	1	1	1	1
143	2	50	0	0	11	0	1	1	1	1	0	1	1	3	2	3	0	2	2	4	1
144	2	60	0	1	11	2	4	2	0	-99	-99	-99	-99	4	4	4	0	1	2	2	1	Country just starting to implement PrEP
145	2	54	0	1	14	0	4	2	1	1	0	0	0	4	4	-99	0	1	2	2	1	N/A (and said N/A to #11)
146	2	36	0	1	11	0	3	2	0	-99	-99	-99	-99	1	2	2	2	3	2	2	4	My lack of education
147	2	57	1	1	14	0	4	1	1	1	0	0	0	4	4	4	0	0	1	1	0	Cost of labs and office visit of PrEP
148	2	51	1	1	11	2	4	0	1	1	0	0	0	3	3	3	1	2	2	1	4	Comfort and practice ; education
149	2	60	1	1	11	4	4	2	0	-99	-99	-99	-99	3	3	3	1	1	2	5	1	Insurance
150	2	60	1	1	11	4	4	0	1	0	0	1	1	4	4	4	1	1	2	1	2	Insurance coverage
151	2	54	0	0	11	4	4	0	1	1	0	1	0	4	4	4	3	3	1	5	0	Is it really necessary? Tx = prevention. If partner (+) and undetectable, just do it
152	2	45	1	1	14	1	1	2	1	0	0	1	0	3	3	3	1	1	2	1	-99
153	2	38	1	1	32	6	1	6	0	-99	-99	-99	-99	2	2	2	1	2	0	1	1
154	2	60	1	1	14	1	2	1	1	1	0	0	0	4	4	4	2	1	0	1	0	Drug coverage
155	2	57	0	1	11	1	4	2	1	0	0	0	1	3	3	3	1	1	2	1	1
156	2	36	0	7	11	0	2	1	1	1	0	0	0	4	4	4	0	1	2	2	2	Have not had carriers in a couple cases. Much bigger barrier to assisted reproductive technologies.
157	2	28	0	1	11	4	2	0	0	-99	-99	-99	-99	3	3	3	1	3	2	1	1
158	2	71	0	1	11	0	4	0	1	1	0	0	0	2	2	1	0	1	2	2	1
159	2	58	1	1	11	4	4	6	0	-99	-99	-99	-99	4	4	4	1	1	2	2	1	Have not recommended PrEP for conception
160	2	62	1	1	11	4	4	6	0	-99	-99	-99	-99	2	2	2	0	0	2	3	4
161	2	33	1	1	11	4	3	6	0	-99	-99	-99	-99	3	3	3	4	2	2	4	4
162	2	53	0	3	11	4	2	0	0	-99	-99	-99	-99	4	4	-99	0	1	2	2	0
163	2	50	0	1	11	4	1	0	0	-99	-99	-99	-99	1	1	1	0	3	2	2	4
164	2	55	0	1	11	0	1	0	0	-99	-99	-99	-99	3	3	-99	1	0	2	1	1
165	2	83	0	1	11	0	4	1	0	-99	-99	-99	-99	3	3	4	0	1	2	1	-99
166	2	57	0	1	11	0	2	1	1	1	0	0	0	3	3	3	1	1	2	1	4	Cost, time
167	2	34	1	1	11	0	3	1	1	1	0	0	0	3	3	3	0	2	2	2	1
168	2	49	1	5	11	6	4	6	0	-99	-99	-99	-99	0	0	0	2	2	2	2	2
169	2	43	1	5	11	6	1	6	0	-99	-99	-99	-99	0	0	0	2	2	2	1	1
170	2	50	0	3	11	0	2	1	1	1	0	0	0	2	4	4	0	3	2	2	1	Cost/stigma
171	2	67	0	1	11	4	4	0	1	0	0	1	0	3	3	3	2	1	2	1	2	Patients recognizing and accepting their risk factors
172	2	64	0	0	11	0	4	0	1	1	0	0	0	1	3	1	1	0	2	2	0
173	2	54	0	1	11	0	4	1	1	1	0	0	0	4	4	4	0	0	2	1	1
174	2	44	0	1	11	0	3	2	1	1	0	0	0	2	1	1	2	2	2	1	2	I would review recommendations and drug safety, only barrier would be coverage of medication / insurance depending upon population access to care.
175	2	48	1	1	11	2	1	5	0	-99	-99	-99	-99	3	3	3	1	1	2	1	1
176	2	40	1	5	11	6	2	5	1	1	0	0	0	-99	-99	-99	1	-99	-99	-99	-99
177	2	53	1	0	11	0	1	1	1	1	0	0	0	3	3	3	0	1	2	2	2
178	2	52	0	1	11	0	4	1	0	-99	-99	-99	-99	3	3	3	0	1	2	2	1
179	2	60	1	0	11	5	1	0	0	-99	-99	-99	-99	0	4	4	4	4	2	0	1
180	2	54	0	1	11	1	4	1	1	1	0	0	0	2	2	3	3	2	0	5	1	No experience with it so no problems. I have no HIV + patients who wish to conceive
181	2	60	0	1	11	0	4	1	1	1	0	0	0	2	2	5	2	2	2	5	2	None, I haven't had this issue in my practice
182	2	33	1	5	11	0	3	0	1	1	0	1	0	3	3	3	2	1	2	1	4	Limited provider ability, uncomfortable PCPs to prescribe, taking on primary care issues for HIV - patients, insurance coverage for PrEP, balance between needing adherence to frequent testing versus just wanting patients to get the meds even if they miss some tests.
183	2	38	1	1	11	0	2	0	0	-99	-99	-99	-99	4	4	4	0	0	2	1	4	Conceiving partner (female) has no PCP or insurance to pay for monitoring labs (cr, phos, ua, HIV & STI)
184	2	50	1	1	11	0	1	1	0	-99	-99	-99	-99	3	4	3	0	1	2	2	2
185	2	57	0	1	11	2	3	5	0	-99	-99	-99	-99	3	3	3	1	3	2	-99	-99
186	2	63	0	1	16	0	4	2	0	-99	-99	-99	-99	3	3	3	0	0	-99	-99	-99
187	2	54	1	1	-99	0	1	1	1	1	0	0	0	4	4	4	0	0	2	4	4	Cost! Getting pts treated for substance abuse
188	2	38	0	1	36	0	3	0	0	-99	-99	-99	-99	3	3	3	3	1	4	5	1	Risk-benefit analysis for PREP is needed; if partner has undetectable VL for several months-years. PrEP really needed ("Swiss statement")
189	2	68	1	1	11	0	4	1	1	1	0	0	0	3	3	3	0	3	2	2	1
190	2	44	0	5	11	4	1	1	1	1	0	1	1	2	2	2	1	2	2	1	2
191	2	68	0	0	11	0	4	0	0	-99	-99	-99	-99	2	4	4	1	2	0	2	1
192	2	66	0	1	35	0	4	0	1	1	0	0	0	3	3	4	0	1	2	1	2	Not risk issues in SF (?)
193	2	71	0	1	35	0	-99	1	0	-99	-99	-99	-99	-99	-99	-99	-99	-99	-99	-99	-99
194	2	46	1	5	11	6	1	0	1	1	0	0	0	4	4	4	1	1	2	4	2
195	2	32	1	1	11	0	0	0	1	1	0	0	0	3	4	-99	2	1	2	1	2	#11 "N/A". None - I see only VA patients - currently all men and most MSM
196	2	73	1	1	11	4	4	0	1	1	0	0	0	4	4	4	0	0	2	1	1	Encountered resistance to PrEP from MDs who firmly believe it increases permiscuity and therefore is a bad and immoral thing to do.
197	2	37	1	1	11	0	3	0	0	-99	-99	-99	-99	4	4	4	0	2	2	1	1	$
198	2	58	1	1	11	0	4	1	1	1	0	0	0	2	3	3	0	3	2	1	2	Insurance coverage. Access to at risk population
199	2	35	1	5	11	0	2	1	1	1	0	0	0	4	4	4	0	3	2	2	1
200	2	62	1	1	11	0	4	0	1	1	0	0	0	3	3	3	1	1	2	2	1	Demonstrate safety of PrEP for conception purposes
201	2	62	0	1	11	4	4	0	0	-99	-99	-99	-99	4	4	-99	0	1	2	1	2	#11 "N/A"
202	2	39	1	1	11	0	3	0	1	1	0	0	0	3	3	3	0	1	2	1	1
203	2	61	1	5	11	4	4	5	0	-99	-99	-99	-99	-99	3	3	-99	0	-99	-99	-99
204	2	31	1	-99	11	2	3	2	1	1	0	1	0	4	4	4	3	1	1	1	1
205	2	33	1	1	11	5	3	0	0	-99	-99	-99	-99	0	-99	-99	-99	-99	-99	-99	-99
206	2	32	1	0	-99	5	0	5	0	-99	-99	-99	-99	-99	3	3	2	2	4	1	4	Side effects of both woman and child (terotogeneity) - long-term and short-term ; cost; duration of tx for child
207	2	46	1	5	11	6	1	5	0	-99	-99	-99	-99	2	2	2	0	2	2	2	1
208	1	-99	1	0	18	2	-99	1	0	-99	-99	-99	-99	4	4	4	2	0	2	1	1
209	1	49	1	3	18	0	4	0	1	0	0	0	1	4	4	4	1	1	2	2	1
210	1	48	1	0	18	0	1	2	1	1	0	0	0	3	3	3	4	4	2	1	1	Insurance coverage
211	1	39	1	6	18	1	1	3	0	-99	-99	-99	-99	2	0	3	2	1	2	1	1
212	1	52	1	1	-99	4	-99	0	1	1	0	0	0	2	3	3	0	2	2	1	2
213	1	60	1	1	18	0	1	1	0	-99	-99	-99	-99	3	3	3	0	2	2	1	1	Many women have had it drummed into them that during pregnancy they should avoid all non-necessary medications. They are very reluctant to take PrEP
214	1	53	0	1	18	0	4	4	1	1	0	1	0	4	4	4	1	0	2	1	1	Patient fear of teratogenic effects
215	1	34	1	1	18	0	3	2	1	1	0	1	1	3	3	3	2	1	2	1	1	Cost, compliance
216	1	41	1	5	18	0	3	2	1	1	1	1	1	3	3	3	1	0	1	1	2	Intermittent use in high risk population (co-subs use, etc.) & $ if undonated
217	1	27	0	5	18	2	3	2	1	1	0	1	0	3	4	3	2	2	2	1	1
218	1	39	1	3	18	1	3	1	0	-99	-99	-99	-99	3	3	3	-99	0	2	1	2
219	1	41	1	3	18	0	1	1	0	-99	-99	-99	-99	1	1	1	3	1	2	2	0	Cost
220	1	41	0	6	18	0	2	2	1	1	0	0	0	4	3	3	0	0	2	2	0
221	1	61	0	1	7	0	4	1	1	1	0	0	0	1	3	3	3	3	2	1	1
222	1	70	0	1	20	0	4	0	0	-99	-99	-99	-99	1	1	1	2	0	2	1	1	If HIV + partner is completely suppressed (6-12 months) and CD4 >300 then PrEP thought not necessary by many HIV experts. However, some might give PrEP.
223	1	60	1	3	18	0	2	1	1	1	0	1	1	3	4	4	0	0	2	1	1	Adherence; effect on fetus
224	1	50	0	5	18	0	4	1	1	1	0	1	0	4	4	4	2	0	2	1	4	Patients varying lifestyle and their perception of acquiring the HIV infection.
225	1	60	1	3	2	2	1	1	0	-99	-99	-99	-99	3	4	4	3	0	2	1	2	Not being able to see HIV negative patients; I have and refer pt to PCP
226	1	64	1	1	20	4	4	6	1	0	0	1	0	3	3	4	3	1	1	1	2	Side effects; cost - if not inurance free med, neg good for 6 months
227	1	58	1	1	2	2	2	0	1	1	0	0	0	4	4	4	1	1	0	1	1
228	1	50	1	1	2	2	2	1	1	1	0	0	0	4	4	4	1	2	2	1	6	Insurance coverage or lack of insurance
229	1	29	0	5	18	0	0	1	1	1	0	0	0	3	3	3	1	1	2	2	1
230	1	28	1	5	18	0	0	2	0	-99	-99	-99	-99	1	4	4	4	3	2	1	4
231	1	61	1	1	18	2	4	1	0	-99	-99	-99	-99	3	3	3	1	1	2	2	1	My patients who have become pregnant have not planned the pregnancy to my knowledge
232	1	60	0	1	18	2	1	1	1	1	0	0	0	4	3	2	0	0	2	1	2	Insurance coverage; adherence
233	1	43	1	0	18	2	1	2	1	1	0	1	0	4	4	4	1	0	2	1	2
234	1	32	0	1	18	0	0	0	0	-99	-99	-99	-99	3	3	2	2	3	2	1	1	No experience
235	1	49	1	1	9	0	4	1	1	1	0	1	0	3	3	3	2	1	2	1	1
236	1	61	1	1	18	0	4	1	1	0	0	1	0	3	4	4	2	0	2	1	4	Concern about possible harm to fetus
237	1	-99	1	1	18	5	4	0	-99	-99	-99	-99	-99	-99	-99	-99	0	1	2	2	1
238	1	51	1	1	18	2	4	2	1	1	0	1	1	4	4	4	3	1	2	1	4	Insurance issues / co-payments
239	1	58	1	0	18	4	-99	0	0	-99	-99	-99	-99	-99	3	3	0	0	2	1	2	"N/A" to #'s 6 and 8a
240	1	49	0	5	18	0	1	0	1	1	0	0	1	3	4	4	2	1	2	1	1	Third party paying: patient fatigue when it takes long to conceive
241	1	37	0	3	18	0	2	2	0	-99	-99	-99	-99	1	2	2	0	1	2	1	1
242	1	38	0	0	18	0	1	0	1	1	0	0	0	4	4	3	0	0	2	1	2	Not sure
243	1	69	1	1	18	0	4	5	0	-99	-99	-99	-99	2	4	4	1	2	2	2	2
244	1	41	0	1	18	0	2	1	1	1	0	0	0	4	4	4	3	0	2	1	0	Prior to PrEP - courage was an issue, noteably for lab studies
245	1	55	0	1	21	0	4	2	1	1	0	1	0	3	4	3	2	3	2	2	4
246	1	56	1	5	2	0	1	0	0	-99	-99	-99	-99	3	3	3	1	1	0	2	1
247	1	33	0	1	18	0	0	0	0	-99	-99	-99	-99	2	1	1	1	1	2	2	1
248	1	48	0	1	18	4	4	0	-99	-99	-99	-99	-99	-99	4	4	0	1	2	1	2
249	1	51	1	0	18	0	4	1	1	0	0	1	0	3	4	4	0	0	2	2	1
250	1	60	0	-99	18	2	1	2	1	1	0	1	0	4	4	4	1	2	4	4	4	No experience
251	1	41	1	1	18	2	1	0	1	1	0	0	0	4	4	4	0	0	1	1	1
252	1	33	1	5	-99	0	0	0	0	-99	-99	-99	-99	3	3	3	1	1	2	2	2
253	1	39	1	1	20	0	3	2	0	-99	-99	-99	-99	3	2	2	-99	-99	2	1	2	Insurance coverage/cost to patient
254	1	31	1	1	7	5	0	2	0	-99	-99	-99	-99	2	2	2	0	0	2	1	2
255	1	58	0	1	7	1	4	0	0	-99	-99	-99	-99	4	4	4	0	0	2	1	1
256	1	55	1	1	18	0	4	1	1	1	0	0	0	4	3	4	2	1	2	2	1
257	1	39	1	0	18	2	2	5	0	-99	-99	-99	-99	3	4	4	1	0	2	1	0	Adherence to treatment
258	1	58	1	5	18	4	4	2	0	-99	-99	-99	-99	4	4	4	3	0	2	2	1	We referred patient/couple to GYN or assisted reproductive services
259	1	59	1	1	18	0	3	2	0	-99	-99	-99	-99	4	4	4	-99	-99	2	2	1
260	1	41	1	5	2	0	2	0	0	-99	-99	-99	-99	2	3	3	1	2	2	2	1
261	1	56	1	3	18	0	1	2	0	-99	-99	-99	-99	4	4	4	2	0	2	1	1	Coverage and patient's compliance
262	1	63	1	5	18	0	4	0	0	-99	-99	-99	-99	3	3	2	1	1	1	1	2
263	1	63	0	1	18	0	4	1	0	-99	-99	-99	-99	2	2	2	3	2	0	1	2
264	1	34	1	6	18	0	0	0	1	1	0	0	0	3	3	3	1	1	2	1	1	Cost/insurance coverage/adherence
265	1	38	0	0	18	2	2	2	1	1	0	0	0	4	3	3	0	1	1	1	1
266	1	49	1	3	18	2	1	1	1	1	1	0	0	3	3	3	1	0	2	1	1	Patients are still not knowledgeable of PrEP and continues to put themselves at risk. Women prefers that partners are undetectable and they do not think they will be infected.
267	1	69	0	1	18	0	2	0	1	-99	-99	-99	-99	4	4	4	2	4	2	2	2
268	1	61	0	3	18	1	4	5	0	-99	-99	-99	-99	1	1	2	4	3	2	2	1	Patient commitment to treatment
269	1	33	1	5	20	0	3	0	0	-99	-99	-99	-99	4	4	4	1	2	0	1	1
270	1	70	0	1	18	0	4	0	1	1	0	0	0	4	4	4	0	0	2	2	1	< 0 risk of HIV transmission (VL may be <20, but not necessarily semen)
271	1	28	1	1	9	0	0	2	1	0	0	1	0	1	3	3	0	1	2	1	1	Weary around lack of data specifically re PrEP in pregnancy, though actually in our pt population, little patient related barriers (OR insurance related; Covers PrEP)
272	1	69	0	1	18	0	4	1	1	1	0	0	0	0	4	4	2	3	2	1	2
273	1	54	1	1	7	2	1	4	0	-99	-99	-99	-99	3	3	3	1	1	2	2	0
274	1	69	0	1	22	0	4	1	0	-99	-99	-99	-99	3	4	4	1	1	1	2	1	Lack of local expertise
275	1	39	0	1	18	0	2	0	0	-99	-99	-99	-99	4	4	4	0	2	2	2	1
276	1	40	1	5	7	0	2	0	0	-99	-99	-99	-99	4	4	4	1	1	2	2	1
277	1	35	0	1	18	0	3	0	0	-99	-99	-99	-99	3	3	3	1	1	2	1	1
278	1	63	0	1	18	0	4	5	1	0	0	1	0	3	3	3	0	0	2	2	1
279	1	54	0	1	18	0	4	1	1	1	0	0	0	4	4	4	0	0	2	2	1	Willingness to take meds during conception
280	1	41	1	5	18	0	2	0	0	-99	-99	-99	-99	4	4	4	0	1	2	1	1
281	1	42	1	5	18	0	1	0	1	1	0	0	0	3	3	2	0	1	2	1	0	Cost
282	1	47	1	1	18	0	1	0	1	0	0	0	1	3	3	3	3	1	1	1	1	Lack of insurance and lack of office resources to help with adherence programs
283	1	56	1	5	7	0	1	0	0	-99	-99	-99	-99	4	4	4	3	1	2	1	1
284	1	35	0	0	18	0	0	2	0	-99	-99	-99	-99	3	4	4	1	2	2	2	1
285	1	38	0	0	18	6	2	5	1	1	0	1	0	2	-99	-99	-99	-99	-99	-99	-99
286	1	74	0	-99	11	0	4	5	0	-99	-99	-99	-99	4	4	4	0	0	1	1	4	none
287	1	-99	1	1	18	0	4	1	0	-99	-99	-99	-99	4	4	4	1	1	2	2	1
288	1	42	0	1	18	0	1	5	0	-99	-99	-99	-99	3	3	3	2	1	2	1	0	none
289	1	59	1	5	18	0	4	0	0	-99	-99	-99	-99	4	4	4	1	1	1	4	2	Insurance, adherence, resistance
290	1	60	1	5	18	2	3	2	0	-99	-99	-99	-99	3	2	2	0	1	2	1	2
291	1	45	1	0	18	5	0	0	0	-99	-99	-99	-99	1	1	1	1	1	2	1	1	Insurance will not pay for it
292	1	65	0	5	20	2	4	0	0	-99	-99	-99	-99	4	4	4	2	0	2	1	1	Availability of medication
293	1	37	1	5	18	6	1	5	0	-99	-99	-99	-99	0	0	0	1	4	2	4	1	N/A
294	1	62	1	1	-99	1	1	0	1	0	1	0	0	3	3	3	0	0	2	1	3
295	1	61	1	1	2	2	4	0	1	1	0	1	1	4	4	4	3	4	2	1	2	Now that we have PrEP + TASP, no need for fertility referral unless there is a fertility issue
296	1	34	0	3	18	4	3	2	0	0	0	1	0	1	1	1	1	1	2	2	1
297	1	34	0	0	18	2	3	1	1	1	0	0	0	3	3	3	2	1	2	1	1
298	1	49	0	6	7	5	3	1	0	-99	-99	-99	-99	0	0	0	1	1	2	1	1	Cost
299	1	55	0	0	7	0	4	1	1	1	0	0	0	4	4	4	4	4	1	1	0
300	1	41	0	1	18	0	1	2	1	1	0	0	0	4	4	4	4	4	2	2	1
301	1	43	1	3	-99	1	1	0	0	-99	-99	-99	-99	3	3	3	1	1	2	2	1
302	1	59	1	1	7	4	4	1	0	-99	-99	-99	-99	4	4	4	0	2	2	1	0
303	1	33	1	3	18	0	0	0	0	-99	-99	-99	-99	3	3	3	1	2	2	1	1
304	1	41	1	1	18	2	2	6	0	-99	-99	-99	-99	3	3	3	2	3	2	2	1
305	1	36	1	-99	18	2	3	2	0	-99	-99	-99	-99	4	4	4	0	3	2	1	1
306	1	64	0	1	18	0	4	1	1	1	0	0	0	4	4	4	1	2	5	4	4
307	1	45	0	1	18	2	1	1	1	1	0	0	0	2	2	2	0	1	2	1	1	Lack of knowledge among Obs
308	1	53	1	1	18	2	1	0	0	-99	-99	-99	-99	3	3	3	2	1	2	1	2
309	1	37	0	1	18	4	3	0	0	-99	-99	-99	-99	3	3	3	0	0	2	1	1
310	1	56	1	3	18	2	2	1	1	1	0	0	0	4	4	4	0	0	2	1	-99	Missed doses due to hyperemesis
311	1	54	1	1	18	2	4	0	1	1	0	0	0	4	4	4	1	0	2	1	5	Buy in from practice admin
312	1	58	1	1	18	2	1	2	0	-99	-99	-99	-99	2	4	4	0	2	1	1	2	Concerns re. first trimester risks?
313	1	50	0	5	20	0	4	0	1	1	0	0	0	4	4	4	1	1	2	2	2	No experience yet
314	1	-99	1	1	18	4	-99	0	0	-99	-99	-99	-99	2	2	2	-99	-99	2	2	1
315	1	52	1	3	18	4	4	0	0	-99	-99	-99	-99	4	4	4	1	0	2	1	1
316	1	30	1	1	36	6	0	5	0	-99	-99	-99	-99	-99	4	4	1	1	-99	-99	-99
317	1	61	1	1	18	3	4	0	0	-99	-99	-99	-99	4	4	4	1	1	-99	-99	-99
318	1	26	-99	1	7	5	0	5	0	-99	-99	-99	-99	3	3	3	1	2	2	2	4
319	1	37	1	1	7	0	0	6	0	-99	-99	-99	-99	3	3	3	0	1	2	2	1
320	1	55	0	1	18	0	4	1	1	1	0	0	0	3	4	4	0	1	2	1	1
321	1	56	1	1	18	2	4	2	1	0	0	1	0	3	3	3	3	1	4	5	5	Unclear/conflicting data on safety/necessity.
322	1	62	1	1	-99	2	4	0	0	-99	-99	-99	-99	4	4	4	2	0	2	1	1
323	1	49	1	1	18	0	1	1	1	0	0	1	1	3	3	3	2	2	2	1	2
324	1	57	1	1	20	2	1	0	0	-99	-99	-99	-99	5	3	3	0	3	2	2	1	Who will be responsible for ordering and marking(?) labs if endecets (?)
325	1	-99	1	1	18	4	4	0	0	-99	-99	-99	-99	4	4	4	2	4	2	2	0
326	1	36	1	5	18	0	3	0	1	0	0	1	0	4	3	3	1	0	2	1	1
327	1	59	1	5	18	4	-99	0	1	1	0	0	0	3	3	3	0	0	1	4	0
328	1	51	0	1	18	4	3	5	0	-99	-99	-99	-99	0	0	0	1	1	2	1	1
329	1	42	0	6	18	5	1	0	0	-99	-99	-99	-99	1	1	1	1	1	2	1	0
330	1	56	1	1	18	0	4	0	0	1	0	1	1	4	4	4	0	1	2	2	0	Insurance coverage of medication, possibly adherence
331	1	62	1	1	7	2	4	3	1	0	0	1	1	3	-99	3	0	0	2	2	2	Adherence
332	1	40	1	1	18	0	3	2	0	-99	-99	-99	-99	1	3	3	0	0	2	2	0
333	1	30	1	5	18	6	3	1	0	-99	-99	-99	-99	4	4	4	0	0	0	1	2
334	1	45	1	1	18	1	2	0	0	-99	-99	-99	-99	4	4	4	2	1	0	2	1
335	1	56	0	1	18	0	4	0	0	-99	-99	-99	-99	3	2	2	1	3	2	2	1
336	1	40	1	3	18	2	1	2	1	0	0	0	1	4	4	4	0	0	2	1	1	Medication coverage for the uninsured but I know there is a program like ADAP
337	1	50	0	0	18	0	4	1	0	-99	-99	-99	-99	4	4	4	0	2	2	1	0	Insurance prior to(?) option
338	1	-99	0	1	20	0	4	0	1	1	0	0	0	4	4	4	2	2	2	2	1
339	1	57	1	1	9	4	4	0	0	-99	-99	-99	-99	4	4	4	1	0	2	1	2
340	1	-99	1	3	18	0	4	1	0	-99	-99	-99	-99	2	2	2	2	2	2	1	2	Health insurance coverage & patient's reluctance to take meds
341	1	33	1	5	18	0	3	2	0	-99	-99	-99	-99	3	3	3	0	1	2	4	1	Follow-up cost/paper work. Population selection for appropriate use. Concern for long-term complications medically ie. TDF.
342	1	51	0	1	10	0	1	0	1	1	1	1	1	4	4	4	0	0	2	1	2	Insurance coverage
343	1	44	1	5	18	0	1	0	1	1	0	0	0	4	4	4	1	1	2	2	1	Cost/insurance
344	1	34	1	1	18	2	2	2	1	1	0	0	0	3	3	3	2	0	2	1	4
345	1	65	0	1	18	0	4	1	1	1	0	0	0	4	4	4	0	0	4	4	3
346	1	63	0	1	18	0	4	0	1	1	0	0	0	4	4	4	0	0	2	4	1
347	1	46	1	1	18	3	2	0	0	-99	-99	-99	-99	4	3	3	1	1	2	2	1
348	1	68	0	1	18	0	4	4	0	-99	-99	-99	-99	4	4	4	0	0	0	1	1
349	1	43	1	0	18	0	1	0	1	1	0	0	0	4	4	4	-99	0	-99	-99	-99
350	1	54	1	1	18	4	4	6	0	-99	-99	-99	-99	3	3	3	2	1	2	1	1	Insurance companies making access to meds difficult - has nothing to do with conception, just in general. Requirements for us of mail order pharmacies leads to missed doses of meds, for both HIV (-) and HIV (+) patients.
351	1	33	1	1	2	0	3	0	0	-99	-99	-99	-99	3	3	3	0	1	2	2	1
352	1	34	0	0	20	0	3	2	1	0	0	0	1	3	3	3	1	0	2	1	2
353	1	48	1	7	18	0	1	4	0	-99	-99	-99	-99	3	2	3	3	1	2	1	3	Concerns for fetus/child - acceptability to patient
354	1	56	0	3	18	6	1	5	0	-99	-99	-99	-99	0	0	0	2	2	2	2	0
355	1	54	1	3	18	4	1	0	1	0	0	1	0	4	4	4	2	0	2	1	1	arbtheral (?)
356	1	-99	1	1	-99	-99	-99	-99	-99	-99	-99	-99	-99	-99	-99	-99	-99	-99	-99	-99	-99
357	1	44	0	1	18	4	3	5	0	-99	-99	-99	-99	2	2	0	0	3	2	1	2
358	1	64	1	3	20	2	4	0	0	-99	-99	-99	-99	3	3	3	0	0	2	1	2	Cost, insurance companies paying, documentation or needs(?)
359	1	60	1	1	18	0	4	1	0	-99	-99	-99	-99	3	3	3	1	0	0	1	1	Insurance
360	1	59	0	1	-99	2	4	2	1	1	0	0	0	4	3	3	1	3	0	1	1	None as I see almost completely MSM
361	1	55	1	1	7	0	4	0	1	1	0	0	0	3	2	3	1	1	2	2	1
362	1	72	0	3	18	0	4	1	0	-99	-99	-99	-99	3	2	-99	0	1	2	2	2
363	1	-99	1	1	18	2	3	4	1	1	0	1	0	4	4	4	2	1	2	1	-99
364	1	41	1	7	18	0	2	1	1	1	0	1	0	1	4	4	0	1	2	2	2
365	1	65	1	5	18	1	4	-99	0	-99	-99	-99	-99	3	4	4	1	1	2	1	1
366	1	55	1	6	18	2	1	0	0	-99	-99	-99	-99	4	4	4	0	0	2	2	4	Have not encountered any barriers
367	1	52	1	1	20	0	1	0	0	-99	-99	-99	-99	3	3	3	1	0	2	2	1
368	1	66	1	1	18	0	4	1	0	-99	-99	-99	-99	2	3	3	0	4	2	2	1	Follow-up on adherence
369	1	77	0	1	35	0	4	5	0	-99	-99	-99	-99	5	5	5	1	1	2	2	1	Lack of knowledge
370	1	61	1	5	18	0	4	2	0	-99	-99	-99	-99	2	3	3	1	2	0	1	1
371	1	56	0	3	18	0	1	2	1	1	0	0	0	3	3	3	1	2	2	2	1
372	1	38	1	1	9	4	2	0	0	-99	-99	-99	-99	2	1	1	2	0	2	1	4
373	1	63	1	1	18	4	2	0	0	-99	-99	-99	-99	4	4	4	2	1	2	2	1
374	1	33	0	0	20	0	0	0	0	-99	-99	-99	-99	3	4	4	0	1	2	1	1
375	1	61	1	1	18	0	4	5	1	1	0	1	0	3	3	3	1	2	2	2	2
376	1	55	0	1	18	0	4	0	1	1	0	0	0	4	4	4	1	1	2	1	1
377	1	43	1	1	18	0	2	1	0	-99	-99	-99	-99	3	4	3	1	3	2	1	4	Lack of guidelines, insurance coverage
378	1	54	0	0	20	0	1	2	1	1	0	1	0	3	3	3	4	1	0	1	1
379	1	57	1	1	-99	4	1	0	0	-99	-99	-99	-99	4	4	4	0	1	2	1	4
380	1	30	1	1	18	2	3	0	1	1	0	0	0	4	3	2	2	1	2	1	1	Adherence issues
381	1	35	0	3	7	0	3	0	1	1	0	0	0	4	4	3	1	1	2	2	4
382	1	60	1	1	18	1	1	1	0	-99	-99	-99	-99	3	3	3	4	1	1	1	0
383	1	58	1	3	18	0	4	0	0	-99	-99	-99	-99	3	3	3	1	2	2	1	1	Insurance companies paying for work-up and meds
384	1	42	1	5	18	0	2	1	1	1	0	0	0	3	3	3	0	0	2	1	2
385	1	59	1	1	20	2	1	6	1	1	0	0	0	3	4	3	2	0	1	1	1	None; just needing insurance prior auth.
386	1	62	0	3	18	0	4	0	0	-99	-99	-99	-99	2	3	3	1	-99	2	1	1
387	1	-99	1	5	18	0	3	0	0	-99	-99	-99	-99	3	3	3	1	1	2	1	2
388	1	-99	-99	-99	18	0	2	2	0	-99	-99	-99	-99	2	3	3	1	3	2	1	2	Concerns about med effects on fetus; dicomfort with & condoms
389	1	60	1	1	18	0	4	1	1	1	0	0	0	4	4	4	0	0	2	1	1
390	1	63	0	1	18	6	4	5	0	-99	-99	-99	-99	0	-99	-99	-99	-99	2	1	1
391	1	63	0	1	18	5	4	5	1	1	0	0	0	4	4	3	2	0	0	1	0	Cost; denial that pt is at risk
392	1	-99	0	7	20	4	-99	0	0	-99	-99	-99	-99	2	2	1	1	2	2	1	4	Prior authorizations; cost of PrEP
393	1	30	1	1	0	1	3	1	0	-99	-99	-99	-99	3	3	3	1	3	2	1	2
394	1	48	1	5	2	0	1	0	0	-99	-99	-99	-99	4	4	4	0	0	2	1	1	Cost; coverage; fear
395	1	70	1	1	2	2	1	0	0	-99	-99	-99	-99	3	3	3	0	1	2	1	1
396	1	44	1	3	18	2	2	1	0	1	1	1	1	3	3	3	0	0	1	2	2
397	1	51	0	1	20	5	4	0	0	-99	-99	-99	-99	4	4	3	1	1	2	2	1
398	1	42	1	1	20	6	1	0	0	-99	-99	-99	-99	3	3	3	0	3	1	2	1
399	1	45	1	1	20	6	-99	5	0	-99	-99	-99	-99	5	2	5	2	1	2	3	0	Have not encountered this use yet but seems like a reasonable strategy
400	1	57	1	1	18	0	4	1	1	1	0	0	0	2	3	2	1	1	2	1	0	Insurance status
401	1	42	1	1	18	1	2	0	1	1	0	0	0	3	3	3	0	0	2	1	4
402	1	61	0	1	18	1	4	4	1	1	0	0	0	4	4	4	3	1	2	1	2	Affordability of medication; insurance coverage; insurance co-payment
403	1	36	2	1	18	2	3	0	1	0	0	1	0	4	4	4	3	1	2	1	2	Adherence to visits; margin of risk (ie it's not 0%)
404	1	52	0	5	18	0	1	1	0	-99	-99	-99	-99	3	3	3	0	0	2	1	1
405	1	54	1	1	18	2	1	6	0	-99	-99	-99	-99	3	3	3	1	1	0	1	1	Financial barriers; monitoring barriers
406	1	48	1	1	20	4	-99	5	-99	-99	-99	-99	-99	-99	-99	-99	-99	-99	-99	-99	-99	I do not work in a clinical setting
407	1	57	1	1	18	0	4	6	1	1	0	0	0	4	3	4	1	1	2	2	1
408	1	52	1	3	18	0	1	0	0	-99	-99	-99	-99	4	4	4	2	3	2	2	4	N/A
409	1	52	1	5	18	0	4	0	1	1	0	0	1	3	3	3	0	2	2	1	2	None
410	1	50	0	1	18	0	1	1	1	1	0	0	0	3	2	2	2	1	2	-99	-99
411	1	54	1	5	18	0	4	1	1	1	0	0	0	3	3	3	0	4	2	0	0
412	1	50	1	1	7	2	4	0	0	-99	-99	-99	-99	3	3	3	1	1	2	1	1
413	1	54	0	1	18	0	4	0	1	0	0	0	1	3	3	3	1	1	2	4	4
414	1	48	1	1	18	0	1	2	0	-99	-99	-99	-99	3	3	3	3	1	2	1	1
415	1	45	0	0	18	0	2	0	1	1	0	0	0	4	4	4	1	1	2	2	1	Insurance company
416	1	61	0	3	18	0	4	1	1	1	1	1	0	4	4	4	0	1	2	4	2	Availability - non compliance
417	1	51	1	0	18	2	2	2	0	-99	-99	-99	-99	-99	-99	-99	-99	-99	-99	-99	-99
418	1	68	0	1	18	0	4	0	1	1	0	0	0	4	4	4	1	0	2	1	1	Long-term safety; renal toxicity
419	1	33	0	1	18	0	0	2	0	-99	-99	-99	-99	3	4	4	2	2	0	2	1	Identification of those at risk, insurance uptake and adherence, willingness to participate partner disclosure(?)
420	1	31	1	1	18	0	0	2	0	-99	-99	-99	-99	2	-99	2	3	3	1	2	5	cost/insurance companies
421	1	45	1	5	18	6	0	0	0	-99	-99	-99	-99	0	1	0	2	1	2	1	0
422	1	53	0	1	1	0	4	0	1	1	0	0	0	4	4	4	0	2	2	1	1	Insurance coverage issues
423	1	58	1	1	18	2	4	6	1	1	0	0	0	4	4	4	2	0	2	1	1	None
424	1	59	0	1	18	0	4	0	1	1	0	0	1	1	3	3	3	0	2	1	1	Adherence
425	1	55	1	1	18	2	1	2	1	0	0	1	0	3	4	4	4	4	2	4	2	HIV stigma in conversation
426	1	56	1	1	18	4	1	5	0	-99	-99	-99	-99	4	4	4	3	1	2	1	1
427	1	47	1	3	18	6	-99	-99	-99	-99	-99	-99	-99	-99	-99	-99	-99	-99	-99	-99	-99
428	1	52	1	1	20	4	-99	0	0	-99	-99	-99	-99	0	0	0	4	4	1	1	1	I do not work directly with HIV patients. I do chart reviews for Ryan White sites in New Jersey - have no patient contact
429	1	44	0	0	18	4	3	2	0	-99	-99	-99	-99	4	4	4	0	3	2	2	2	I?m unfamiliar with PrEP for conception
430	1	50	0	1	18	1	1	2	1	1	0	0	0	4	4	4	2	3	2	2	1
431	1	37	1	1	18	0	2	0	1	1	0	0	0	3	4	4	1	1	2	2	2
432	1	71	0	5	18	0	4	1	0	-99	-99	-99	-99	4	4	4	0	2	2	1	1
433	1	53	0	1	18	0	1	0	0	-99	-99	-99	-99	3	3	3	1	3	2	1	1
434	1	62	0	1	18	0	4	1	1	1	1	0	0	4	3	3	1	3	2	1	0
435	1	51	1	0	20	-99	1	0	0	-99	-99	-99	-99	4	3	3	0	0	0	2	1	Education
436	1	44	1	1	18	0	2	1	0	-99	-99	-99	-99	2	3	3	1	2	2	2	2	Cost. Is there data supporting that this is safe and effective?
437	1	50	0	6	18	4	1	5	0	-99	-99	-99	-99	0	3	3	0	0	2	1	1	"N/A"
438	1	33	1	5	18	0	0	1	1	1	0	1	0	2	2	2	1	2	2	1	4
439	1	69	0	6	18	0	4	0	0	-99	-99	-99	-99	3	4	4	2	1	2	1	1	"N/A"
440	1	63	1	1	18	2	2	0	0	1	0	0	0	4	3	3	1	3	1	2	1
441	1	53	1	1	18	0	1	4	0	-99	-99	-99	-99	2	2	2	3	3	5	1	4
442	1	-99	0	3	18	1	1	6	0	-99	-99	-99	-99	3	3	3	0	0	2	1	1
443	1	59	1	1	20	0	4	0	0	-99	-99	-99	-99	4	3	3	2	1	0	2	1
444	1	-99	1	1	18	0	4	0	0	-99	-99	-99	-99	2	2	2	0	2	0	2	0	Prior authorization
445	1	46	1	7	18	0	2	1	1	1	0	0	0	4	4	4	2	1	2	1	4	None
446	1	55	1	7	18	2	-99	3	1	0	0	1	1	-99	5	3	3	0	2	1	2	So far so good. Insurance has paid
447	1	30	1	5	2	0	0	0	1	1	0	0	1	4	4	4	1	0	2	1	4
448	1	40	1	5	18	0	2	0	1	1	0	0	0	1	3	3	1	3	2	1	1
449	1	53	0	5	18	0	1	2	1	1	0	0	0	2	3	3	1	2	2	2	2	Data on safety/efficacy?
450	1	45	0	5	18	0	1	2	1	1	0	0	0	4	4	4	1	1	2	1	2	Cost and coverage
451	1	60	1	1	33	0	4	1	1	0	0	1	0	3	4	3	3	2	2	1	0	Knowledge of the BEST therapy is not yet known. How long before attempted conception? Ho long to continue past. Is 2 pills pre and 1 for 2 days after enough?
452	1	57	1	4	18	4	-99	0	0	1	0	0	0	3	3	3	2	2	2	1	1	Encouraged implemnting PREP for conception purposes
453	1	37	0	0	20	0	3	0	0	-99	-99	-99	-99	2	3	3	3	1	2	1	0	costs, adherence and tolerability are barriers that I foresee in my patient population
454	1	44	0	0	20	0	3	2	0	-99	-99	-99	-99	2	2	2	2	1	2	1	2	Price; medication adherence; patient education; insurance; increased risk and other STDs
455	1	55	0	1	20	0	4	2	0	-99	-99	-99	-99	3	3	3	1	2	0	1	1	cost
456	1	27	0	1	20	6	3	1	0	-99	-99	-99	-99	3	3	3	1	1	2	2	1
457	1	50	1	1	18	0	1	2	1	1	0	1	0	2	2	1	1	2	2	1	4
458	1	25	0	1	20	6	3	0	0	-99	-99	-99	-99	1	1	1	0	1	2	2	1
459	1	61	1	1	20	6	4	5	0	-99	-99	-99	-99	4	3	3	1	2	2	2	1	The resistance from partners
460	1	52	1	5	18	4	3	0	0	-99	-99	-99	-99	4	4	4	1	1	2	2	1
461	5	62	1	1	24	0	4	1	0	-99	-99	-99	-99	2	2	2	2	1	2	1	1	Have not treated any patient for this
462	5	32	0	1	24	5	3	0	0	-99	-99	-99	-99	-99	-99	-99	-99	-99	-99	-99	-99
463	5	32	1	1	24	6	3	1	0	-99	-99	-99	-99	0	0	0	1	1	2	2	1	Side effects/cost
464	5	30	1	5	25	0	0	0	1	0	0	0	1	3	4	4	0	0	2	1	0
465	5	31	1	5	25	0	0	0	1	0	0	1	0	3	3	3	1	2	1	-99	2
466	5	31	0	5	25	0	0	0	0	-99	-99	-99	-99	2	2	2	0	2	2	2	0
467	5	32	0	-99	25	0	0	0	1	1	0	0	0	2	3	3	2	0	2	2	1
468	5	48	0	0	0	0	1	1	0	-99	-99	-99	-99	2	3	3	1	0	2	1	2	Insurance coverage of drug
469	5	56	0	1	24	0	4	1	1	0	0	1	1	4	4	4	1	1	4	1	1
470	5	58	0	5	24	0	1	0	0	-99	-99	-99	-99	4	1	1	3	1	2	0	1	Cultural; political
471	5	39	0	5	26	0	3	0	1	1	0	0	0	1	1	1	2	2	2	2	1	Cultural barrier
472	5	55	1	1	24	2	3	-99	1	1	0	0	0	2	3	5	0	1	2	2	1
473	5	40	0	1	-99	6	2	0	1	1	0	0	0	2	2	2	1	0	2	1	4
474	5	35	1	1	24	0	3	4	1	1	0	0	0	4	4	3	2	2	2	1	1
475	5	28	1	0	-99	5	-99	-99	0	-99	-99	-99	-99	4	3	3	1	1	2	1	3	N/A
476	5	50	0	3	-99	5	-99	5	0	0	0	1	0	4	4	4	-99	-99	-99	-99	-99
477	5	53	1	3	24	4	4	-99	0	-99	-99	-99	-99	4	4	4	0	1	2	2	1
478	5	33	1	1	24	0	0	0	0	-99	-99	-99	-99	2	2	2	2	2	2	1	1
479	5	33	1	7	24	0	0	4	1	1	0	0	0	3	4	4	0	3	2	2	1
480	5	36	1	5	24	6	1	0	1	1	0	0	0	3	3	3	1	1	0	1	1
481	5	43	1	0	24	4	2	0	0	1	0	0	0	4	3	4	2	2	1	-99	2
482	5	43	1	5	24	0	1	0	0	-99	-99	-99	-99	4	4	4	2	1	2	1	1
483	5	32	1	5	24	0	0	0	0	-99	-99	-99	-99	2	2	1	1	3	2	1	2	Cost
484	5	52	1	0	25	0	4	2	0	-99	-99	-99	-99	4	4	4	0	0	0	1	1	Getting partner to come in for visits and take meds (if HIV - is the male)
485	5	54	0	1	24	1	1	2	0	-99	-99	-99	-99	3	4	4	2	1	2	2	1	N/A
486	5	49	1	7	26	2	1	6	1	1	0	1	0	4	4	4	0	0	2	1	2
487	5	-99	0	1	27	0	4	0	0	-99	-99	-99	-99	4	4	3	0	1	-99	-99	-99
488	5	60	1	1	27	4	1	0	0	-99	-99	-99	-99	3	3	3	0	2	2	2	1
489	5	45	1	1	24	0	2	2	1	0	0	0	1	3	3	3	3	1	2	1	2	I only see HIV positive patients in my clinic. Due to restrictions on funding, I cannot currently care for HIV negative people.
490	5	52	0	1	24	6	4	5	0	-99	-99	-99	-99	4	4	4	4	4	0	2	0
491	5	60	0	1	24	6	4	0	1	1	0	0	0	3	3	3	2	0	2	2	4
492	5	53	0	1	24	0	4	2	0	-99	-99	-99	-99	4	4	4	1	3	2	2	2
493	5	49	1	3	24	0	2	0	1	1	0	0	0	3	3	4	1	1	2	0	1
494	5	57	0	1	24	0	4	0	0	-99	-99	-99	-99	2	2	2	0	1	2	1	0
495	5	37	1	1	24	6	1	0	0	-99	-99	-99	-99	-99	-99	-99	-99	-99	2	2	1
496	5	23	0	1	24	5	3	0	0	-99	-99	-99	-99	3	3	3	0	2	2	3	1	Community knowledge is poor, and most marketing focuses on MSM use - not women who are at high risk.
497	5	41	0	3	24	0	2	0	1	0	0	1	0	1	2	3	0	3	2	1	2
498	5	29	1	1	25	4	0	0	0	-99	-99	-99	-99	3	3	3	2	2	2	1	2
499	5	59	1	1	25	4	4	6	1	1	0	0	0	3	3	2	1	3	2	2	0
500	5	37	1	1	24	0	3	0	0	-99	-99	-99	-99	2	3	3	3	2	2	3	1	I do not have a lot of HIV patients(?) in practice
501	5	43	0	1	24	0	2	0	1	1	0	0	0	4	4	4	0	1	2	1	1	Adverse effects of TDF/FTC for the baby and when to stop PrEP - after conception; after birth, etc.
502	5	37	1	5	24	0	3	0	0	-99	-99	-99	-99	3	3	3	1	2	0	2	1
503	5	33	1	1	24	4	2	1	0	-99	-99	-99	-99	4	4	4	1	1	4	1	1
504	5	41	1	1	24	4	3	5	0	-99	-99	-99	-99	3	2	3	2	2	2	1	0	Cost and coverage by insurance
505	5	34	0	1	24	1	2	1	1	1	0	0	0	3	4	4	3	1	2	1	1	Low incidence of planned pregnancy. Sero negative partner not in care or not seeing someone comfortable with PrEP
506	5	32	1	1	24	6	2	5	0	-99	-99	-99	-99	2	2	2	2	1	2	1	2	I don't feel prepared to answer questions about PrEP for conception
507	5	59	0	6	24	0	4	0	0	-99	-99	-99	-99	3	3	3	0	2	0	1	0
508	5	59	1	1	24	0	4	0	0	-99	-99	-99	-99	4	4	4	1	1	2	1	1
509	5	42	0	5	24	0	2	2	1	1	1	1	0	4	4	4	0	1	2	1	2
510	5	47	1	1	24	4	1	-99	0	-99	-99	-99	-99	3	3	3	1	1	2	1	3
511	5	55	0	1	24	0	4	2	0	-99	-99	-99	-99	4	4	4	2	1	2	1	4
512	5	69	0	1	28	0	4	1	0	-99	-99	-99	-99	2	2	2	2	1	2	1	1
513	5	55	0	1	24	0	1	4	1	1	0	0	0	1	4	4	1	2	2	4	4
514	5	39	1	1	25	6	1	0	1	1	0	0	0	3	2	2	3	1	2	1	0	Cost of medication; follow-up labs
515	5	39	1	5	25	0	2	0	1	1	1	1	0	3	2	2	1	1	2	1	1
516	5	34	1	1	24	0	0	3	0	-99	-99	-99	-99	2	5	4	0	0	2	2	1	Long follow-up on fetuses exposed to in utero PrEP is needed for possible terategenic effect
517	5	-99	1	3	24	6	4	0	0	-99	-99	-99	-99	3	4	4	1	0	2	2	1
518	5	45	1	0	24	5	-99	1	0	-99	-99	-99	-99	4	3	3	1	1	2	1	0
519	5	31	1	1	24	5	3	5	0	-99	-99	-99	-99	4	4	4	1	1	2	1	1
520	5	36	0	5	24	0	2	0	0	-99	-99	-99	-99	4	4	4	0	0	2	2	1	Cost, insurance coverage
521	5	59	1	1	25	2	1	0	1	1	0	0	0	4	4	4	1	1	1	5	1	Decision making + / - PrEP if partner is suppressed
522	5	57	0	1	24	0	4	0	0	-99	-99	-99	-99	4	4	4	1	2	2	1	1	Nobody will pay for it
523	5	50	0	1	24	6	1	0	0	-99	-99	-99	-99	-99	4	2	-99	-99	-99	-99	-99
524	5	35	1	1	24	4	1	6	0	-99	-99	-99	-99	4	4	4	1	1	2	2	2
525	5	49	0	1	24	0	4	0	1	1	0	0	0	4	4	4	1	3	2	2	1	Lack of knowledge by medical care providers and lack of referral centers / resources
526	5	64	1	1	24	0	4	0	1	1	0	0	0	4	4	4	2	2	4	2	2
527	5	30	0	1	14	1	-99	1	1	1	0	0	0	3	3	2	1	1	2	1	2	I have limited experience in this setting
528	5	48	0	1	-99	0	1	0	1	1	0	0	0	3	3	3	0	1	2	2	1	Coding for visits, high "copays" (1/2 cost of Rx drug), pre-authorizations
529	5	56	1	1	24	4	4	3	0	-99	-99	-99	-99	4	4	4	1	1	2	1	1	Insurance
530	5	49	1	3	24	5	1	0	0	-99	-99	-99	-99	1	0	0	1	0	1	-99	-99
531	5	57	0	1	24	0	4	0	0	-99	-99	-99	-99	4	4	4	1	2	2	2	1
532	5	35	0	1	24	0	0	0	1	1	0	0	0	4	4	4	1	2	0	2	0
533	5	34	1	1	-99	0	3	0	1	0	0	0	1	2	2	2	0	2	2	2	1	Approved PrEP regimens have not been well studied in pregnancy
534	5	32	0	5	24	0	0	0	1	1	0	0	0	4	4	4	2	2	0	1	2	Haven't encountered this issue in my training/practice
535	5	59	1	1	24	4	-99	0	0	-99	-99	-99	-99	2	3	3	0	-99	2	1	-99
536	5	49	0	3	24	4	4	5	0	-99	-99	-99	-99	4	4	4	1	2	1	1	1
537	5	39	1	3	24	0	2	1	0	-99	-99	-99	-99	2	1	1	1	1	2	2	1	Concerns with drug effect with clients
538	5	40	1	5	12	0	2	2	1	0	0	1	0	1	3	3	4	0	2	1	1
539	5	42	1	5	24	0	2	2	0	-99	-99	-99	-99	4	4	4	1	1	0	1	1
540	5	40	0	1	24	0	3	0	1	1	0	0	0	2	2	2	2	2	0	1	1
541	5	33	0	5	24	0	3	4	1	1	0	0	0	4	4	3	0	0	2	2	0
542	5	33	1	1	24	1	3	2	0	-99	-99	-99	-99	4	4	4	3	0	2	2	1
543	5	40	0	1	22	0	1	2	1	1	0	0	0	4	4	4	2	1	2	2	1	Cost
544	5	34	0	5	24	0	2	2	1	0	0	1	0	2	4	4	0	1	2	1	1	Comfort discussing teratogenicity on long term risk to child
545	5	30	0	1	24	6	2	0	0	-99	-99	-99	-99	-99	-99	-99	1	1	2	2	1
546	5	68	0	1	35	0	4	2	0	-99	-99	-99	-99	-99	-99	-99	0	0	0	2	1	Failure of PrEP; Development of resistance to Truvada in the instance of transmission; detrement to fetus; monitoring renal function
547	5	38	1	1	24	5	1	0	0	-99	-99	-99	-99	4	3	3	0	0	2	1	1
548	5	36	1	1	24	5	1	5	0	-99	-99	-99	-99	4	4	4	1	1	1	1	1
549	5	29	0	7	-99	5	3	0	-99	-99	-99	-99	-99	4	4	4	2	0	2	2	1
550	5	50	1	-99	22	0	1	0	0	-99	-99	-99	-99	4	4	4	2	0	2	1	4
551	5	56	0	1	24	6	4	0	0	-99	-99	-99	-99	2	1	2	2	1	0	1	2	Reluctance of patients to constantly take and adhere to regimen testing
552	5	57	1	1	24	4	2	5	0	-99	-99	-99	-99	0	-99	0	0	3	2	2	4
553	5	62	1	1	29	2	1	3	0	-99	-99	-99	-99	3	3	3	1	1	2	2	4
554	5	30	1	5	24	6	3	0	0	-99	-99	-99	-99	0	0	0	1	1	2	1	1
555	5	38	1	1	24	6	3	5	0	-99	-99	-99	-99	0	0	0	2	2	2	2	1
556	5	52	0	1	18	0	1	1	1	1	0	0	1	4	4	4	2	0	2	1	1	Adherence to PrEP meds; community knowledge of PrEP; insurance coverage for PrEP; PrEP for uninsured patients; Adherence to f/u PrEP appointments
557	5	51	1	1	24	4	4	5	0	-99	-99	-99	-99	-99	4	4	1	0	2	2	2
558	5	80	0	1	36	0	4	1	1	1	0	0	0	3	2	1	1	2	2	2	1	Geographic area of practice
559	5	31	1	0	26	4	3	0	0	-99	-99	-99	-99	0	0	0	2	2	2	1	1
560	5	43	0	3	26	4	3	0	0	-99	-99	-99	-99	4	4	4	0	0	2	1	1
561	5	33	0	1	26	0	3	0	1	1	1	0	1	4	4	3	2	1	2	1	0	Unclear definitive safety of drug in non HIV + population; still open up for other STIs
562	5	58	0	1	26	0	4	0	1	1	0	0	0	3	3	3	2	1	2	1	1
563	5	61	1	1	24	0	4	1	0	-99	-99	-99	-99	4	4	4	1	0	2	2	2
564	5	60	1	6	24	3	1	5	0	-99	-99	-99	-99	3	3	3	1	2	4	4	3	Mental health, educational, literacy, adherence, etc.
565	5	55	1	1	24	2	1	4	1	1	0	0	0	3	3	3	0	1	2	1	0
566	5	40	1	3	24	5	-99	0	0	-99	-99	-99	-99	0	2	3	2	0	2	2	2
567	5	43	1	3	0	4	2	6	0	-99	-99	-99	-99	4	4	4	1	1	2	-99	-99
568	5	50	0	1	24	2	2	1	1	1	0	0	0	3	3	3	1	1	2	2	1	Cost, insurance issues
569	5	51	1	1	24	0	3	2	0	-99	-99	-99	-99	2	2	2	1	3	2	2	0	No experience with this
570	5	34	1	1	-99	2	2	2	1	1	0	0	0	3	3	3	1	1	2	1	1
571	5	51	1	1	24	2	4	2	1	1	0	0	1	2	4	4	-99	0	0	1	0
572	5	29	0	1	24	6	3	0	0	-99	-99	-99	-99	3	3	3	1	1	2	2	1	In the VA, a problem that has come up is not being able to treat the spouses' of HIV-infected veterans. The spouses are not necessarily covered by the VA, and so these individuals need to discuss PrEP with primary care providers in the private sector.
573	5	32	0	3	26	0	3	2	0	-99	-99	-99	-99	4	4	4	0	0	2	2	1
574	5	35	0	5	24	0	2	1	1	0	0	1	0	4	4	4	0	0	2	1	4
575	5	32	1	1	25	2	3	1	1	1	0	0	1	2	2	2	2	0	2	1	4	Lack of expert consultation available; CDC guidelines incomplete
576	5	43	1	1	25	1	1	0	1	1	0	1	1	3	3	3	2	2	2	1	4
577	5	39	1	1	24	0	3	0	1	1	0	0	0	1	3	3	3	2	2	4	4	cost if uninsured
578	5	32	0	1	22	6	2	0	1	1	0	1	1	4	4	4	0	0	2	1	1	Paying for medication in individuals who are under insured. They have insurance but are not able to afford the deductible/copays
579	5	34	1	1	22	6	2	0	1	1	0	1	1	4	4	4	1	1	2	1	1
580	5	60	1	6	24	1	1	6	0	-99	-99	-99	-99	3	3	2	0	3	0	2	1
581	5	-99	-99	-99	-99	1	1	0	0	-99	-99	-99	-99	4	4	4	0	1	0	2	1
582	5	65	1	1	24	4	-99	6	0	1	0	0	0	4	2	-99	4	4	0	-99	0	Side effects
583	5	31	1	1	24	5	0	0	0	-99	-99	-99	-99	-99	-99	-99	-99	-99	-99	-99	-99
584	5	50	1	1	24	4	-99	0	0	-99	-99	-99	-99	1	1	1	0	2	2	2	2
585	5	24	1	1	24	5	-99	0	0	-99	-99	-99	-99	3	2	0	0	2	2	2	0
586	5	60	1	1	24	2	3	0	1	1	0	0	0	4	4	4	1	2	2	2	1
587	5	54	1	0	26	4	-99	0	0	-99	-99	-99	-99	3	3	3	2	1	2	1	0	Insurance coverage with those with medicaid
588	5	50	1	3	24	0	4	4	1	1	0	0	0	4	4	4	1	1	2	2	1	My hospital feels it's too expensive
589	5	33	1	1	24	2	3	2	0	-99	-99	-99	-99	4	4	4	2	2	2	1	2	Adherence and partner adherence keeping VL undetectable
590	5	33	1	7	24	0	0	3	1	0	0	0	1	4	5	4	0	0	2	2	1	$. In illinois, there is an insurance mandate for ART, so private insurance will cover IUI (for positive female, negative male) or IVF (for negative female, positive male), but medicaid - which most HIV + pts are on - won't cover the procedures. And no insurance will cover sperm washing procedures, which also are not available in IL - we have to send pts to Boston for washing.
591	5	31	1	5	24	0	0	3	1	0	0	0	1	3	5	3	1	0	2	1	1
592	5	44	1	1	24	0	2	2	0	-99	-99	-99	-99	4	4	4	0	0	1	1	2
593	5	31	1	7	24	0	3	2	0	-99	-99	-99	-99	3	4	4	0	1	2	1	1	Concern about legal consequences if seronegative partner becomes positive
594	5	49	0	1	26	0	1	0	0	-99	-99	-99	-99	3	3	3	2	1	0	1	0	(1) Insurance coverage; (2) Barrier precautions after conception
595	5	30	1	0	24	0	0	2	0	-99	-99	-99	-99	3	2	2	0	1	2	1	1	Patient misconceptions about HIV
596	5	39	1	5	24	0	2	2	0	-99	-99	-99	-99	1	1	1	1	1	2	2	1
597	5	41	0	1	24	0	0	2	0	-99	-99	-99	-99	3	3	3	1	1	1	2	2
598	5	55	1	3	24	2	4	2	0	-99	-99	-99	-99	3	3	3	1	1	2	2	1
599	5	35	1	5	24	6	2	0	0	-99	-99	-99	-99	3	2	2	1	1	2	2	1	Cost, education that it is not a magic bullet
600	5	44	1	1	24	0	1	0	0	-99	-99	-99	-99	2	2	2	1	3	2	2	1	Insurance coverage; Reliable follow-up; potential side effects; increased resistance
601	5	42	0	0	24	2	3	2	1	1	0	0	0	4	4	4	1	0	1	1	2
602	5	31	1	1	24	1	2	0	0	-99	-99	-99	-99	4	4	4	0	0	2	1	0
603	5	30	1	1	24	5	0	0	0	-99	-99	-99	-99	-99	-99	-99	1	-99	-99	-99	-99	I'm not a provider, so therefore cannot accurately fill in this survey and have chosen not to, to not skew your study
604	5	32	1	1	24	0	0	0	1	1	0	0	0	3	3	3	0	2	2	2	1
605	5	32	1	7	24	0	0	0	1	1	0	0	0	4	4	4	0	2	2	2	1
606	5	30	1	3	24	0	0	0	1	1	0	1	0	3	3	3	0	1	2	2	1	Insurance coverage
607	5	34	1	1	24	0	0	0	1	0	0	0	1	2	3	3	0	1	2	2	0
608	5	64	1	1	25	2	1	5	0	-99	-99	-99	-99	4	4	4	4	4	2	1	1
609	5	60	1	1	24	4	-99	0	0	-99	-99	-99	-99	2	2	2	1	1	2	2	1
610	5	32	0	1	24	0	3	2	1	1	0	0	0	3	3	3	1	2	2	2	2	Lack of my own knowledge
611	5	62	1	1	24	4	-99	6	0	-99	-99	-99	-99	4	4	4	0	1	2	2	-99
612	5	59	0	1	24	4	4	0	0	-99	-99	-99	-99	3	3	3	0	0	2	2	1
613	5	41	1	1	-99	2	2	4	1	1	0	0	0	2	3	3	1	1	2	1	2	Knowledge of pregnancy _____(?); referring to conception specialist
614	5	39	1	5	24	6	1	0	0	-99	-99	-99	-99	2	2	2	0	1	2	1	1
615	5	31	1	1	24	2	3	3	1	1	0	0	0	3	3	3	3	2	2	1	2	My population is MSM so this has not come up for me in the past year
616	5	33	1	1	24	2	3	0	1	1	0	0	0	3	3	3	0	0	2	1	2	Hesitancy of pt; potential risk to fetus
617	5	31	1	1	24	2	3	2	1	1	0	0	0	4	3	3	3	2	2	1	0
618	5	-99	1	0	24	0	2	0	1	1	0	0	0	4	4	4	0	0	2	1	1
619	5	60	1	1	12	4	-99	0	0	-99	-99	-99	-99	3	3	3	0	1	2	1	1
620	5	40	1	1	12	4	1	0	-99	-99	-99	-99	-99	4	4	4	0	0	2	1	1
621	5	51	1	1	12	4	4	0	1	1	0	0	0	4	1	1	0	0	2	1	1
622	5	42	0	3	24	0	3	0	1	1	0	1	0	3	4	4	0	1	2	2	2	Cost; Routine OBGYN do no have enough experience with PrEP
623	5	-99	1	3	24	4	-99	0	0	-99	-99	-99	-99	4	4	4	1	3	0	1	0	Have not implemented PrEP in this situation
624	5	60	1	0	24	5	-99	5	0	-99	-99	-99	-99	-99	-99	-99	-99	-99	-99	-99	-99
625	5	-99	1	-99	24	4	-99	5	0	-99	-99	-99	-99	4	4	4	0	2	2	2	1	Adherence
626	5	59	1	1	24	5	-99	5	0	-99	-99	-99	-99	-99	-99	-99	-99	-99	0	1	2
627	5	27	1	5	24	5	0	0	0	-99	-99	-99	-99	4	4	4	1	0	1	1	2
628	5	23	1	1	24	5	0	-99	0	-99	-99	-99	-99	0	0	0	4	3	2	1	2
629	5	38	1	3	-99	5	-99	0	0	-99	-99	-99	-99	-99	5	5	5	1	2	1	2
630	5	55	1	1	25	2	3	2	1	1	0	0	0	3	3	3	1	1	2	2	2	Insurance coverage; daily adherence
631	5	35	1	1	24	0	3	0	0	-99	-99	-99	-99	2	2	2	0	2	2	1	0
632	5	36	1	1	24	2	3	2	1	1	0	0	0	2	3	1	0	4	2	1	1
633	5	58	0	1	24	6	4	0	0	-99	-99	-99	-99	5	5	5	0	0	2	1	2
634	5	40	1	1	24	2	1	2	1	1	0	0	0	1	3	3	0	0	2	1	1
635	5	39	1	1	24	2	3	2	1	1	0	0	0	2	1	1	2	2	2	1	2
636	5	44	1	7	24	5	2	5	1	1	0	1	0	4	4	4	3	0	2	1	0	Financial cost; insurance companies; I think it is great
637	5	29	0	1	24	6	3	0	0	-99	-99	-99	-99	3	3	3	2	0	0	1	1	Post conception and mother wanting to continue for peace of mind
638	5	64	0	1	26	0	4	0	0	-99	-99	-99	-99	3	4	4	1	1	2	2	2	(1) Cost; (2) People who have risk factors seem to lack the discipline to take any medicine regularly - and don't want PrEP
639	3	39	1	3	11	5	2	0	0	-99	-99	-99	-99	0	0	0	1	1	2	2	1
640	3	64	0	1	11	0	4	1	0	-99	-99	-99	-99	2	2	2	0	2	1	1	2
641	3	61	0	1	11	0	4	0	1	1	0	0	0	3	4	4	0	1	4	1	1	Insurance pre-authorization
642	3	44	1	5	11	0	1	0	1	1	0	0	0	4	4	4	0	0	0	2	1
643	3	67	0	1	-99	0	4	0	0	-99	-99	-99	-99	4	4	4	1	1	0	2	1
644	3	-99	1	5	11	0	1	2	1	1	0	1	0	4	4	4	1	0	0	4	1	none yet
645	3	68	0	1	11	0	4	2	1	1	0	0	0	3	3	1	0	3	2	1	2	Not had any experience here
646	3	51	0	0	34	2	2	5	1	1	0	0	0	4	4	4	0	0	2	2	0
647	3	37	1	5	11	2	2	5	0	-99	-99	-99	-99	4	4	4	2	2	2	1	2
648	3	67	1	1	35	0	4	0	0	-99	-99	-99	-99	3	4	4	2	0	2	1	2
649	3	-99	1	1	11	6	-99	0	1	1	0	0	0	3	3	3	1	2	2	2	1
650	3	-99	1	5	11	6	2	0	0	-99	-99	-99	-99	3	3	3	3	0	2	1	1	N/A
651	3	58	0	1	11	6	4	6	0	-99	-99	-99	-99	2	2	2	1	2	2	1	1
652	3	66	0	1	11	2	1	2	1	1	0	1	0	4	4	4	0	1	2	2	2
653	3	45	1	5	11	6	1	5	0	-99	-99	-99	-99	2	1	1	1	2	2	2	1
654	3	56	0	1	11	0	4	2	1	1	0	0	0	4	4	4	-99	4	2	1	2	Lack of awareness
655	3	37	0	1	11	0	3	5	0	-99	-99	-99	-99	2	2	2	1	3	4	2	2	Concerns about possible effects of PrEP on the fetus/embryo
656	3	54	1	1	11	1	4	6	0	-99	-99	-99	-99	0	3	3	0	1	2	2	1	Reassurance truvada safe in pregnancy; adherence
657	3	47	0	1	11	0	1	1	0	-99	-99	-99	-99	3	1	1	0	3	2	-99	1
658	3	56	0	1	11	6	4	0	1	1	0	0	0	2	2	1	0	2	2	2	1	Implications of medicine; legal ramifications if child born with birth defects
659	3	60	1	5	11	0	2	1	0	-99	-99	-99	-99	4	4	4	0	1	2	1	2	Poor consistency in taking meds; seroeconomic circumstances, mental illness, substance abuse
660	3	64	0	1	11	4	4	0	1	1	0	0	0	4	4	4	0	0	2	1	2
661	3	44	1	3	11	0	1	0	1	0	0	1	1	4	4	4	0	0	2	1	4
662	3	85	0	1	11	0	4	2	0	-99	-99	-99	-99	4	3	3	0	1	2	1	1
663	3	43	1	0	11	2	1	2	0	-99	-99	-99	-99	4	4	4	0	1	2	1	4	Insurance coverage
664	3	28	1	1	11	5	3	5	0	-99	-99	-99	-99	4	3	3	2	3	2	-99	3
665	3	55	1	1	11	14	4	2	0	-99	-99	-99	-99	4	4	4	1	1	0	4	1	Coverage for meds
666	3	57	1	0	11	2	1	2	-99	-99	-99	-99	-99	2	2	2	2	0	2	1	0
667	3	66	0	1	11	0	4	0	1	1	0	0	0	3	3	3	2	1	2	2	1	Not done yet
668	3	73	0	1	11	0	4	0	1	1	0	0	0	4	4	4	4	1	2	1	1
669	3	33	1	0	11	5	3	-99	0	-99	-99	-99	-99	4	4	4	2	0	0	1	1
670	3	42	0	5	11	2	2	2	0	-99	-99	-99	-99	1	3	3	1	3	1	1	1
671	3	48	1	7	11	0	1	0	1	1	0	0	1	3	3	3	1	2	2	2	1	none
672	3	38	1	1	11	4	2	0	0	-99	-99	-99	-99	4	4	4	1	0	2	2	1	Safety for fetus
673	3	32	0	1	11	4	0	0	0	-99	-99	-99	-99	4	4	4	0	0	0	2	2
674	3	64	1	0	11	4	4	2	0	-99	-99	-99	-99	4	4	4	0	1	2	2	2
675	3	61	0	0	11	0	4	0	1	0	0	1	0	4	4	4	0	0	2	5	-99	Cost; follow-up care/ lab / harm + risk reduction
676	3	52	1	0	28	0	1	2	0	-99	-99	-99	-99	4	4	4	0	0	0	1	1	Insurance coverage
677	3	35	0	5	11	0	3	2	1	1	0	0	0	3	3	3	0	0	2	1	2
678	3	62	1	5	11	2	4	2	1	1	0	1	0	4	4	4	0	2	1	2	2
679	3	34	1	1	11	2	2	2	0	-99	-99	-99	-99	3	3	3	0	1	2	2	4	Insurance coverage
680	3	59	0	1	11	0	1	1	0	-99	-99	-99	-99	3	3	3	3	1	2	5	1
681	3	33	1	1	11	1	2	2	0	-99	-99	-99	-99	2	2	2	3	2	2	1	1
682	3	32	1	1	11	0	0	2	0	-99	-99	-99	-99	4	4	4	1	4	2	1	2	Cost; access
683	3	47	0	1	11	1	1	2	0	-99	-99	-99	-99	2	2	2	1	1	2	1	2
684	3	62	0	3	11	0	4	0	1	1	0	0	0	2	2	2	2	2	2	2	1	Costs; education
685	3	57	0	5	11	0	1	0	1	0	0	1	0	2	1	1	2	1	2	1	1	Non compliance of patient for follow-up
686	3	41	0	1	11	0	2	1	1	1	0	0	0	3	3	3	1	2	2	2	1	Lack of evidence and research
687	3	38	1	5	11	6	1	5	0	-99	-99	-99	-99	3	3	3	1	0	0	1	1
688	3	49	1	5	11	0	1	1	0	-99	-99	-99	-99	2	4	4	1	1	2	2	1	Ensuring patient/couple adherence
689	3	39	0	-99	-99	0	1	2	0	-99	-99	-99	-99	1	1	1	1	1	0	1	1	Fear of getting partner infected if PrEP doesn't work
690	3	54	0	5	11	0	1	1	1	1	0	0	0	4	4	4	0	2	2	1	2
691	3	42	1	7	11	0	2	0	1	1	0	1	0	4	4	4	1	1	0	2	1	Cost; patient preference
692	3	62	1	1	11	4	4	0	0	-99	-99	-99	-99	0	1	1	-99	-99	-99	-99	-99
693	3	35	1	3	11	0	3	1	1	1	0	0	0	3	3	3	2	2	2	1	5	Cost of meds; providers need inservice on this - this should be part of primary care
694	3	46	0	3	11	0	1	2	1	1	0	0	0	4	4	4	3	1	0	1	0
695	3	55	0	1	11	0	4	1	1	1	0	0	0	4	4	4	1	3	2	2	4
696	3	60	1	1	11	0	4	2	0	-99	-99	-99	-99	3	5	4	0	1	0	1	1	Cost and thus availability
697	3	57	1	3	11	1	4	6	0	-99	-99	-99	-99	4	4	4	0	2	2	2	1	(1) Cost of PrEP; (2) Availability; (3) Knowledge of providers in treating/initiating PrEP
698	3	46	0	5	11	6	1	0	0	-99	-99	-99	-99	3	3	3	0	1	2	1	1	Cost and limited data on the on demand PrEP use
699	3	28	1	1	11	4	2	6	0	-99	-99	-99	-99	3	4	3	2	2	2	2	1
700	3	61	1	1	11	2	4	2	0	-99	-99	-99	-99	4	4	4	0	1	2	1	0
701	3	55	1	6	11	2	1	2	0	-99	-99	-99	-99	3	3	2	0	1	0	1	1
702	3	60	0	1	11	0	1	1	1	1	0	0	0	4	4	4	0	4	2	2	2	HIV negative wife does not feel comfortable having unprotected sex and does not want to take a medication (truvada) regularly.
703	3	29	0	3	11	0	0	1	1	1	0	0	0	3	3	3	0	3	2	1	1
704	3	50	0	0	11	0	1	1	1	0	0	1	0	3	3	3	0	1	2	2	1
705	3	44	0	0	11	0	2	0	0	-99	-99	-99	-99	4	4	4	1	3	2	1	1	Resources, lack of guidance and support
706	3	29	0	1	11	6	0	0	0	1	0	0	0	0	2	2	1	1	2	1	1
707	3	34	1	1	-99	2	-99	0	0	-99	-99	-99	-99	1	3	1	4	3	1	2	0
708	3	57	1	1	11	1	4	6	1	0	0	1	0	4	4	4	0	0	2	1	1	Insurance coverage
709	3	52	1	5	11	0	4	0	1	1	0	1	1	4	4	4	1	2	2	4	4	Insurance
710	3	54	1	1	11	0	1	1	0	-99	-99	-99	-99	4	4	4	4	4	2	1	2	None
711	3	62	0	5	11	0	4	1	0	-99	-99	-99	-99	3	3	3	0	1	2	1	4
712	3	36	0	1	11	0	3	2	1	1	0	0	0	2	4	5	1	1	2	2	2
713	3	39	0	5	11	0	3	2	1	1	0	0	0	4	4	4	1	2	2	1	1	Payor source
714	3	67	1	5	11	0	4	0	1	1	0	0	0	4	4	4	2	2	0	2	1
715	3	54	1	3	11	1	4	0	0	-99	-99	-99	-99	3	2	1	2	1	2	2	1	[Can't read writing]
716	3	40	0	1	11	0	3	2	0	-99	-99	-99	-99	4	4	4	2	2	2	3	1	Partners not necessarily covered by some payor and PrEP not yet covered
717	3	37	1	5	11	0	2	1	1	1	0	0	0	3	3	3	0	1	2	2	1
718	3	-99	1	5	11	0	1	0	1	1	0	0	0	3	3	3	1	1	2	2	1
719	3	-99	-99	5	11	0	4	2	0	-99	-99	-99	-99	0	0	1	2	-99	0	2	1
720	3	44	0	5	11	0	1	0	1	1	0	0	0	3	3	3	3	1	2	1	1	Worry over TDF side effects on fetus over long term (parental concerns); probably need long term studies of children of mother's on TDF at time of conception.
721	3	62	1	1	11	5	4	4	0	-99	-99	-99	-99	4	4	4	-99	-99	2	-99	-99
722	3	53	1	0	11	0	1	1	0	-99	-99	-99	-99	3	3	3	0	0	2	2	2
723	3	39	1	5	11	0	2	4	0	-99	-99	-99	-99	4	4	4	0	1	2	2	1	Lack of adequate resources, coverage for services, and consistent recommendations.
724	3	53	1	1	11	0	4	2	1	1	0	1	1	2	4	4	3	0	2	1	2	Patient motivation
725	3	49	1	1	11	0	1	2	1	1	0	0	0	3	4	4	1	0	2	1	1	None
726	3	32	1	1	11	6	2	0	1	1	0	0	0	4	4	4	1	1	0	1	1
727	3	-99	0	1	11	0	4	6	1	1	0	0	0	4	4	4	3	1	2	0	1	None except my own personal feelings that a person who is at risk for bringing an HIV+ child into the world for the rest of us to end up paying for, should not even consider pregnancy.
728	3	49	0	4	11	1	1	2	0	-99	-99	-99	-99	4	4	4	0	0	2	4	4
